# Supplementary material for: Antibody–drug nanoparticle induces synergistic treatment efficacies in HER2 positive breast cancer cells
Source: PubMed Central journal article supplement (PMC8016985; doi:10.1038/s41598-021-86762-6), 2021-04-01
Supplement: 41598_2021_86762_MOESM1_ESM.pdf [file 41598_2021_86762_MOESM1_ESM.pdf]

## Supplementary Information

### **Antibody-Drug Nanoparticle Induces Synergistic Treatment**

### **Efficacies in HER2 Positive Breast Cancer Cells**

Muhammad Raisul Abedin,<sup>a</sup> Kaitlyne Powers,<sup>a</sup> Rachel Aiardo,<sup>a</sup> Dibhya Barua,<sup>b</sup> and Sutapa

Barua<sup>a, #</sup>

<sup>a</sup> Department of Chemical and Biochemical Engineering

<sup>b</sup> Department of Electrical and Computer Engineering

Missouri University of Science and Technology

Rolla, MO 65409

<sup>#</sup> To whom correspondence should be addressed. Email: [baruas@mst.edu](mailto:baruas@mst.edu). Department of Chemical & Biochemical Engineering, 110 Bertelsmeyer Hall, 1101 N. State Street, Rolla, MO 65409-1230

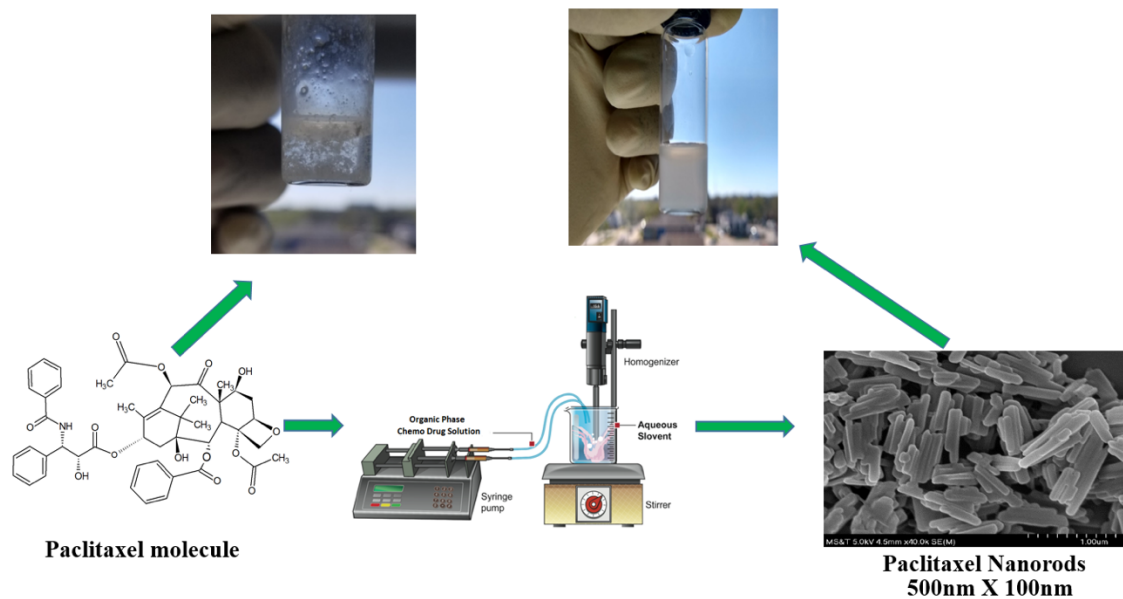

**SI Figure 1: Synthesis process of PTXNRs.** PTXNRs were synthesized using the nanoprecipitation method. Paclitaxel molecules show white floccular aggregation in water, while PTXNRs display complete dispersion in water after the synthesis process.

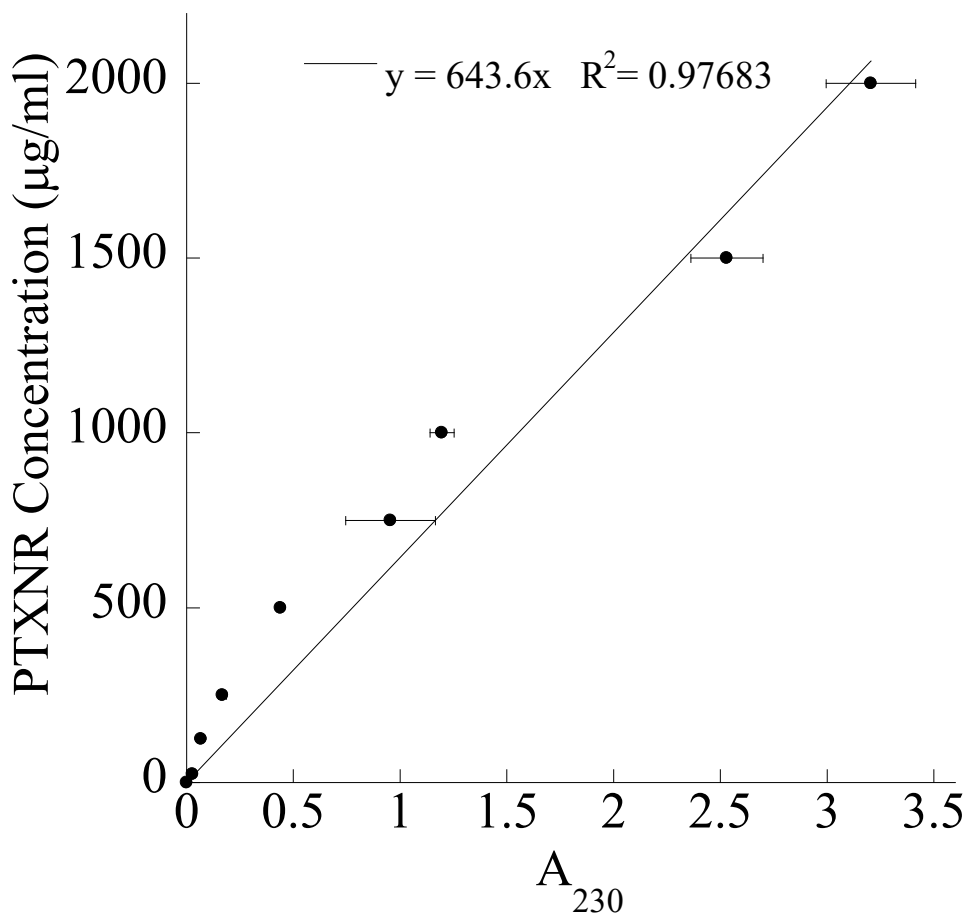

**SI Figure 2:** Calibration curve of PTX for quantification of the amount of PTXNRs in PTXNR-TTZ particles after conjugation with TTZ. The calibration curve was obtained using PTXNRs in PBS at 230 nm absorbance values.

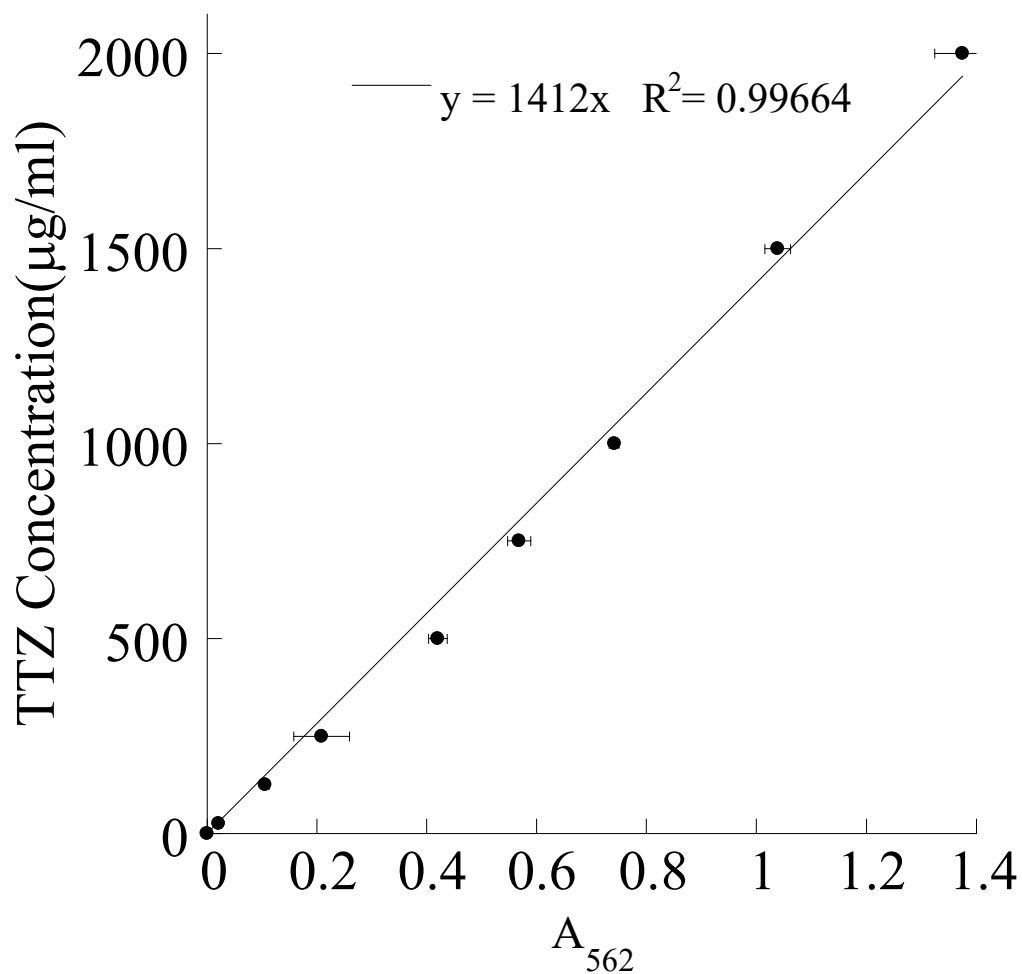

**SI Figure 3:** Calibration curve of Trastuzumab (TTZ) monoclonal antibody for quantification of unconjugated TTZ after conjugation with Paclitaxel nanorods (PTXNRs). The calibration curve was obtained using a BCA protein quantification assay at 562 nm absorbance values.

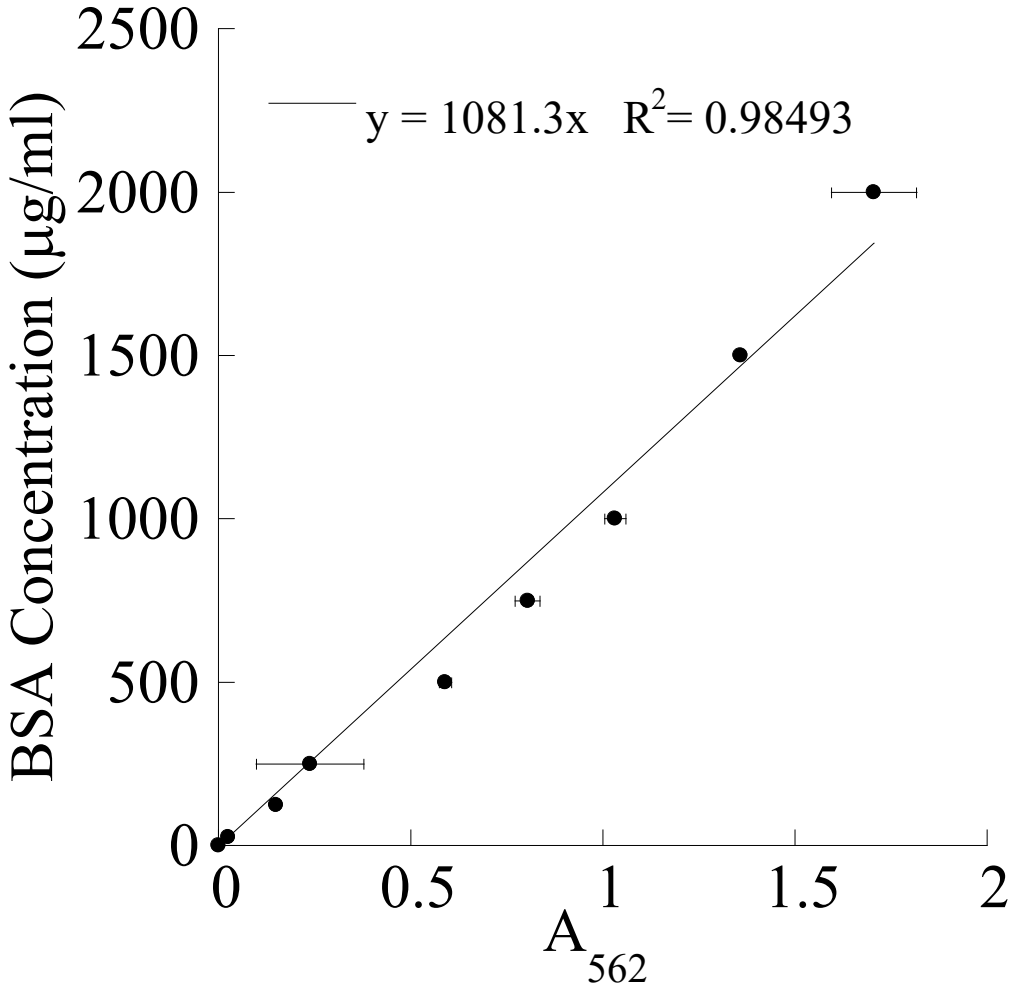

**SI Figure 4:** Calibration curve of BSA protein for quantification of protein in cell lysates for Western blot experiments. The calibration curve was obtained using a BCA protein quantification assay at 562 nm absorbance values.

PTXNR-TTZ in DI Water

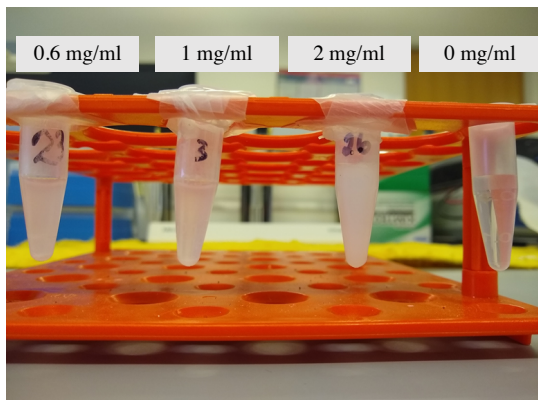

PTXNR-TTZ in PBS

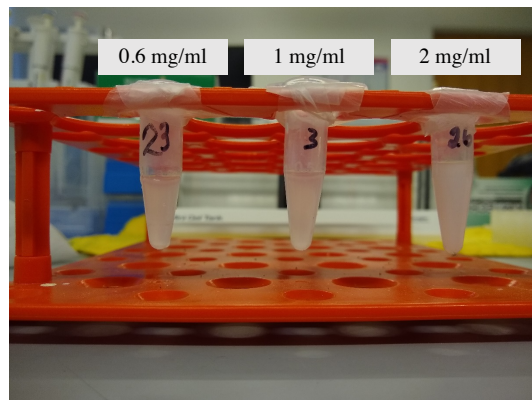

**SI Figure 5:** Colloidal suspensions of PTXNR-TTZ in DI water and PBS at 0.6, 1, and 2 mg/ml concentrations.

**SI Table 1.** Stability analysis of PTXNR and PTXNR-TTZ as a measure of zeta potential value,  $\zeta$  (mV)

| Sample    | Zeta potential, $\zeta$ (mV) |             |
|-----------|------------------------------|-------------|
|           | DI water                     | PBS         |
| PTXNR     | -32.6± 4.82                  | -13.4± 2.81 |
| PTXNR-TTZ | -17.1±3.83                   | -9.5± 0.02  |

**SI Table 2:** Analysis of TTZ conjugation on the surface of PTXNRs

| Initial PTX amount (mg) | % NR formation | Initial PTXNR-CDI amount (mg) | Initial TTZ amount (mg) | % TTZ conjugation efficiency | Amount of PTXNR in 1 mg of PTXNR-TTZ (mg) | Amount of TTZ in 1 mg of PTXNR-TTZ (mg) | PTXNR : TTZ (w/w) (molar ratio) |
|-------------------------|----------------|-------------------------------|-------------------------|------------------------------|-------------------------------------------|-----------------------------------------|---------------------------------|
| 30                      | 64.98±2.37     | 1.0                           | 0.10                    | 95.24±1.40                   | 0.8±0.02                                  | 0.2±0.02                                | 4.0 ± 0.53<br>(681.67 ± 90.23)  |

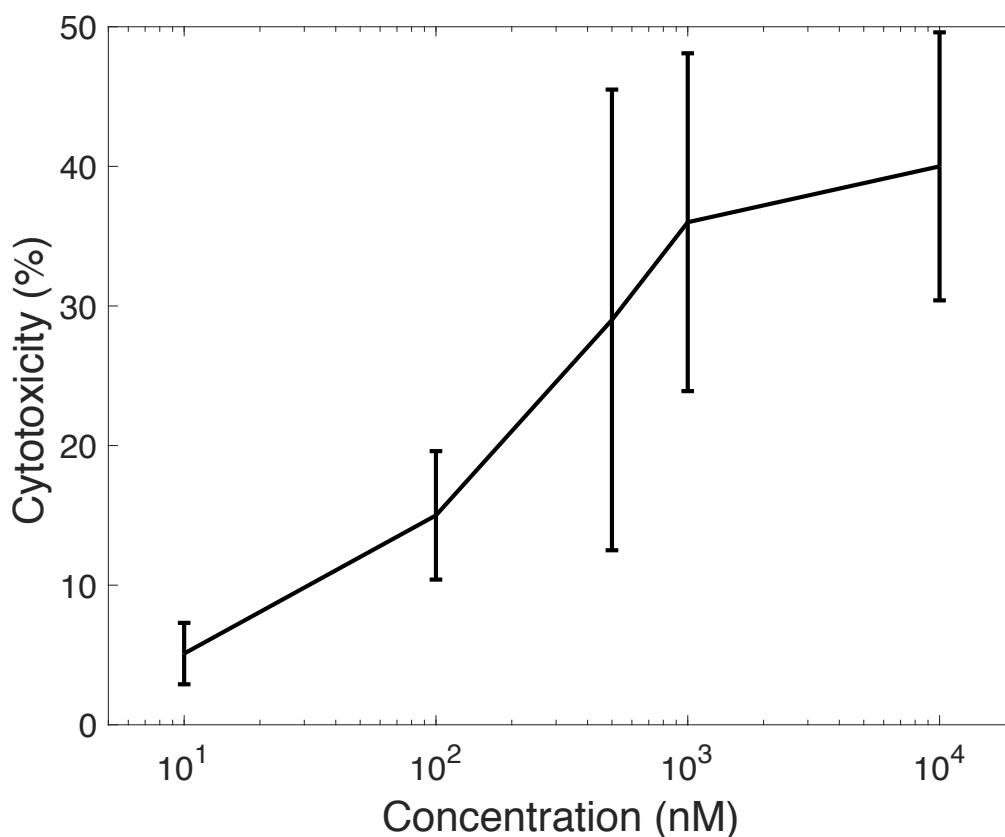

**SI Figure 6:** PTXNR-TTZ showed non-specific cytotoxicity in MCF-10A normal cells *in vitro*.

### SI Table 3: Cytotoxicity Analysis

#### BT-474

| Treatment         | vs. Treatment     | <i>p</i> -value |         |         |         |          |
|-------------------|-------------------|-----------------|---------|---------|---------|----------|
|                   |                   | 10 nM           | 100 nM  | 500 nM  | 1000 nM | 10000 nM |
| PTXNR-TTZ         | PTXNR             | 0.8206          | 0.0296* | 0.0004* | 0.0007* | <.0001*  |
| PTXNR-TTZ         | TTZ               | 0.9579          | 0.0003* | <.0001* | <.0001* | <.0001*  |
| PTXNR-TTZ         | PTX solution      | 0.2244          | 0.3757  | 0.0003* | 0.0002* | <.0001*  |
| PTXNR-TTZ         | PTX solution+ TTZ | 0.9677          | 0.0273* | <.0001* | 0.1745  | 0.0019*  |
| PTX solution+ TTZ | PTXNR             | 0.7809          | <.0001* | 0.6475  | 0.0188* | 0.0743   |
| PTX solution+ TTZ | TTZ               | 0.9898          | <.0001* | 0.1194  | <.0001* | <.0001*  |
| PTX solution+ TTZ | PTX solution      | 0.2241          | 0.1499  | 0.7523  | 0.0055* | 0.0014*  |
| PTXNR             | TTZ               | 0.7712          | 0.0207* | 0.0562  | <.0001* | 0.0031*  |
| PTXNR             | PTX solution      | 0.1495          | 0.0020* | 0.8910  | 0.5452  | 0.0873   |
| PTX solution      | TTZ               | 0.2280          | <.0001* | 0.0743  | 0.0006* | 0.1651   |

#### MDA-MB-231

| Treatment         | vs. Treatment     | <i>p</i> -value |         |         |         |          |
|-------------------|-------------------|-----------------|---------|---------|---------|----------|
|                   |                   | 10 nM           | 100 nM  | 500 nM  | 1000 nM | 10000 nM |
| PTXNR-TTZ         | PTXNR             | 0.1170          | 0.0002* | 0.0186* | 0.0246* | 0.0775   |
| PTXNR-TTZ         | TTZ               | 0.0750          | <.0001* | <.0001* | <.0001* | 0.0002*  |
| PTXNR-TTZ         | PTX solution      | 0.2051          | 0.7412  | 0.4026  | 0.3234  | 0.8855   |
| PTXNR-TTZ         | PTX solution+ TTZ | 0.9123          | <.0001* | 0.0031* | <.0001* | <.0001*  |
| PTX solution+ TTZ | PTXNR             | 0.1282          | <.0001* | <.0001* | <.0001* | <.0001*  |
| PTX solution+ TTZ | TTZ               | 0.0811          | <.0001* | <.0001* | <.0001* | <.0001*  |
| PTX solution+ TTZ | PTX solution      | 0.1562          | <.0001* | 0.0005* | 0.0009* | <.0001*  |
| PTXNR             | TTZ               | 0.8651          | <.0001* | <.0001* | <.0001* | 0.0152*  |
| PTXNR             | PTX solution      | 0.0070*         | 0.0004* | 0.1434  | 0.0032* | 0.1228   |
| PTX solution      | TTZ               | 0.0070*         | <.0001* | <.0001* | <.0001* | 0.0004*  |

#### SK-BR-3

| Treatment         | vs. Treatment     | <i>p</i> -value |         |         |         |          |
|-------------------|-------------------|-----------------|---------|---------|---------|----------|
|                   |                   | 10 nM           | 100 nM  | 500 nM  | 1000 nM | 10000 nM |
| PTXNR-TTZ         | PTXNR             | <.0001*         | 0.8554  | 0.6319  | 0.2213  | 0.0920   |
| PTXNR-TTZ         | TTZ               | <.0001*         | <.0001* | <.0001* | <.0001* | <.0001*  |
| PTXNR-TTZ         | PTX solution      | 0.5424          | 0.0941  | 0.5570  | 0.1245  | <.0001*  |
| PTXNR-TTZ         | PTX solution+ TTZ | 0.8684          | 0.6750  | 0.5804  | 0.0776  | 0.0011*  |
| PTX solution+ TTZ | PTXNR             | <.0001*         | 0.7713  | 0.9276  | 0.4897  | 0.0286*  |
| PTX solution+ TTZ | TTZ               | <.0001*         | <.0001* | <.0001* | <.0001* | <.0001*  |
| PTX solution+ TTZ | PTX solution      | 0.3447          | 0.1213  | 0.9661  | 0.8003  | 0.2079   |
| PTXNR             | TTZ               | 0.9758          | <.0001* | <.0001* | <.0001* | <.0001*  |
| PTXNR             | PTX solution      | <.0001*         | 0.0680  | 0.8939  | 0.6738  | 0.0011*  |
| PTX solution      | TTZ               | <.0001*         | <.0001* | <.0001* | <.0001* | <.0001*  |



### SI Table 4: Apoptosis Assay (Annexin-V-FITC/PI)

#### BT-474

| Treatment  | vs. Treatment | <i>p</i> -value                  |         |         |         |                         |         |         |        |                                         |        |         |         |
|------------|---------------|----------------------------------|---------|---------|---------|-------------------------|---------|---------|--------|-----------------------------------------|--------|---------|---------|
|            |               | Early apoptotic (Annexin-V-FITC) |         |         |         | Non-apoptotic dead (PI) |         |         |        | Late apoptotic dead (Annexin-V-FITC/PI) |        |         |         |
|            |               | 0 h                              | 24 h    | 48 h    | 72 h    | 0 h                     | 24 h    | 48 h    | 72 h   | 0 h                                     | 24 h   | 48 h    | 72 h    |
| PTXN R-TTZ | Untreated     | 0.6536                           | 0.0257* | 0.0017* | <.0001* | 0.5569                  | <.0001* | 0.0003* | 0.6488 | 0.0831                                  | 0.1321 | 0.0005* | 0.0003* |

#### MDA-MB-231

| Treatment  | vs. Treatment | <i>p</i> -value                  |        |         |         |                         |         |         |         |                                         |         |         |         |
|------------|---------------|----------------------------------|--------|---------|---------|-------------------------|---------|---------|---------|-----------------------------------------|---------|---------|---------|
|            |               | Early apoptotic (Annexin-V-FITC) |        |         |         | Non-apoptotic dead (PI) |         |         |         | Late apoptotic dead (Annexin-V-FITC/PI) |         |         |         |
|            |               | 0 h                              | 24 h   | 48 h    | 72 h    | 0 h                     | 24 h    | 48 h    | 72 h    | 0 h                                     | 24 h    | 48 h    | 72 h    |
| PTXN R-TTZ | Untreated     | 0.6624                           | 0.4486 | 0.0082* | 0.0407* | 0.0037*                 | 0.0008* | 0.0002* | 0.0144* | 0.0064*                                 | 0.0104* | <.0001* | 0.0429* |

#### SK-BR-3

| Treatment  | vs. Treatment | <i>p</i> -value                  |        |        |        |                         |        |         |        |                                         |        |         |         |
|------------|---------------|----------------------------------|--------|--------|--------|-------------------------|--------|---------|--------|-----------------------------------------|--------|---------|---------|
|            |               | Early apoptotic (Annexin-V-FITC) |        |        |        | Non-apoptotic dead (PI) |        |         |        | Late apoptotic dead (Annexin-V-FITC/PI) |        |         |         |
|            |               | 0 h                              | 24 h   | 48 h   | 72 h   | 0 h                     | 24 h   | 48 h    | 72 h   | 0 h                                     | 24 h   | 48 h    | 72 h    |
| PTXN R-TTZ | Untreated     | -                                | 0.1871 | 0.2947 | 0.3135 | 0.4910                  | 0.0553 | 0.0295* | 0.5938 | 0.1957                                  | 0.0964 | 0.0002* | 0.0003* |

(a) Untreated

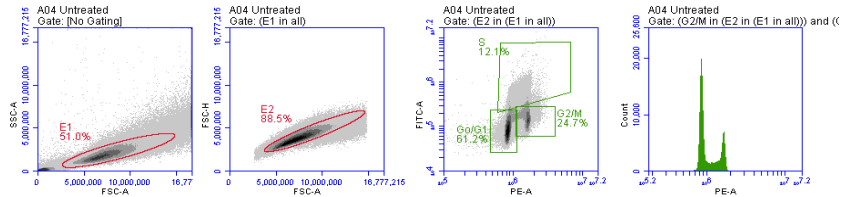

(b) PTXNR

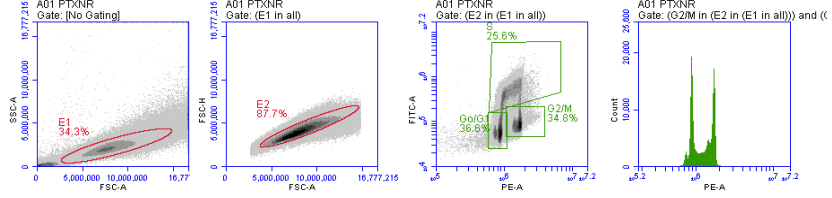

(c) TTZ

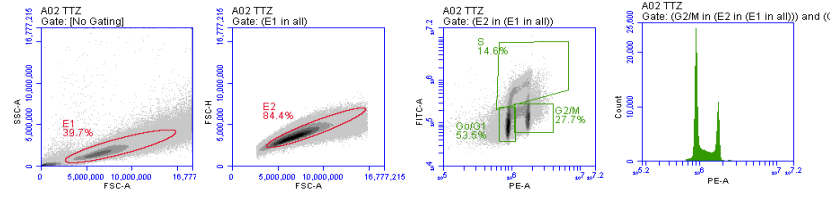

(d) PTXNR-TTZ

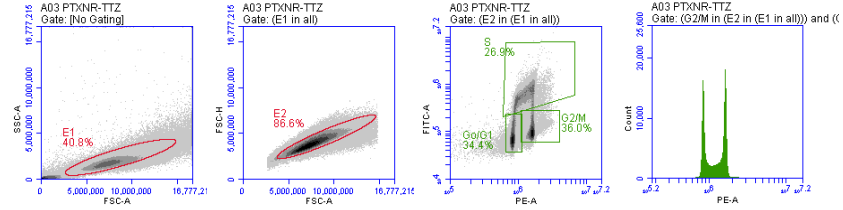

**SI Figure 7:** Flow cytometry data for cell cycle analysis of (a) untreated, (b) PTXNR, (c) TTZ, and (d) PTXNR-TTZ treated BT-474 cells after 24 h. The side scatter (SSC-A) versus forward scatter (FSC-A) gating is used to identify BT-474 cells as gated by E1. The forward scatter height (FSC-H) versus forward scatter area (FSC-A) density plots exclude doublet cells for accurate counting as shown by E2 gating. The plots showing FITC-A and PE-A represent live cells and their stained DNA, respectively, and gated for DNA analysis using Count versus PE-A plots. The Count versus PE-A plots were analyzed using the flow cytometry software to calculate the percentage arrests in G0/G1 (first sharp peak), S (flattened areas), and G2/M (second sharp peak) phases.

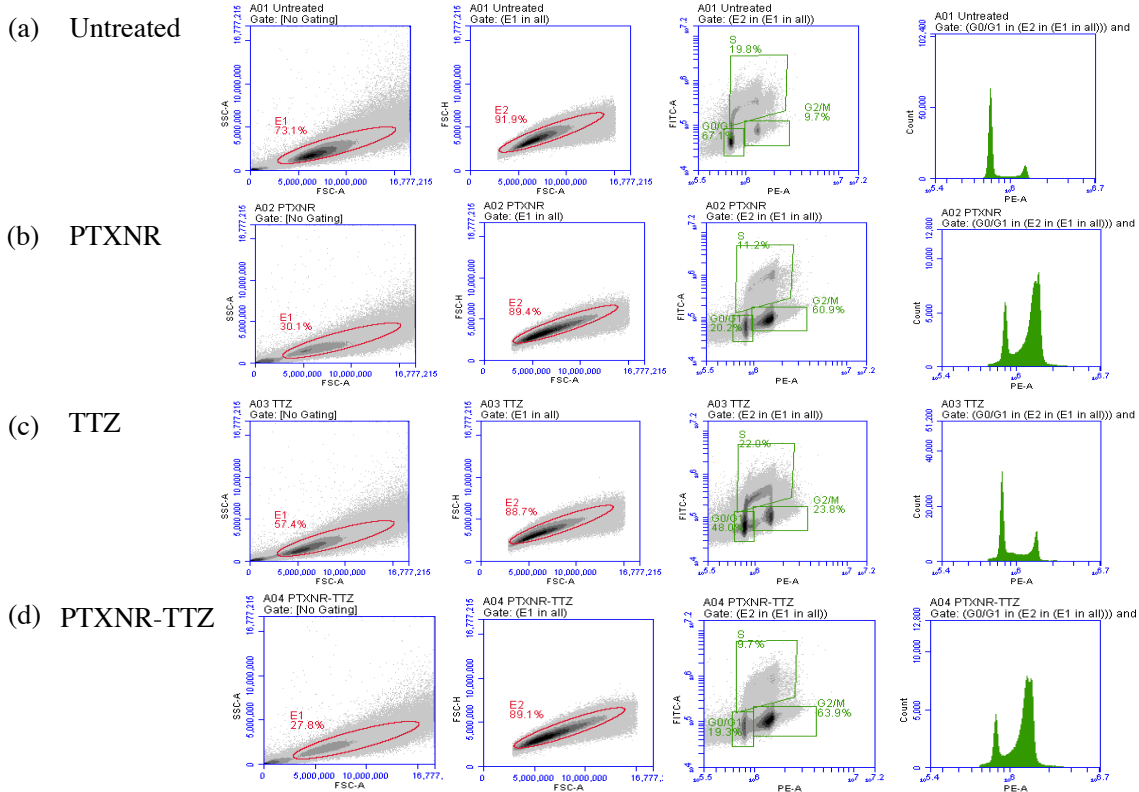

**SI Figure 8:** Flow cytometry data for cell cycle analysis of (a) untreated, (b) PTXNR, (c) TTZ, and (d) PTXNR-TTZ treated BT-474 cells after 48 h. The histogram of relative DNA content in Count *versus* PE-A plots shows a shift in peaks from G0/G1 to G2/M cells in PTXNR and PTXNR-TTZ treated cells compared to untreated and TTZ treated cells.

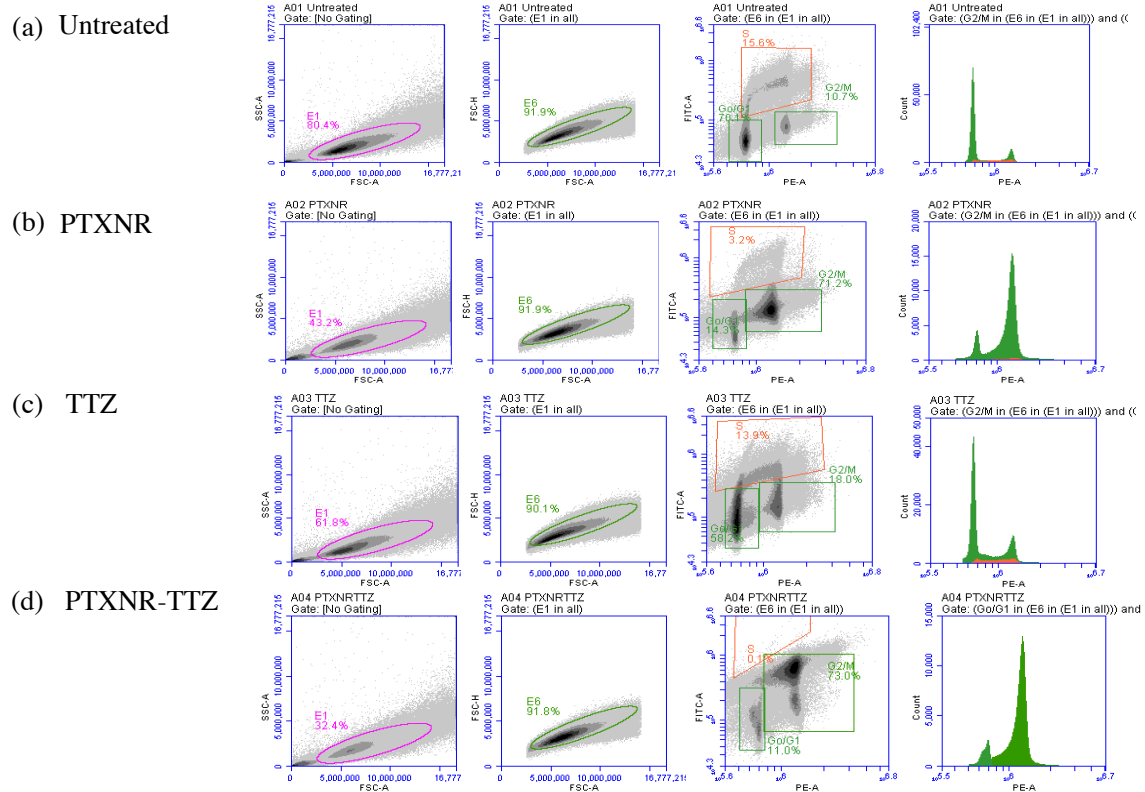

**SI Figure 9:** Flow cytometry data for cell cycle analysis of (a) untreated, (b) PTXNR, (c) TTZ, and (d) PTXNR-TTZ treated BT-474 cells after 72h. By the end of the incubation periods, >80% of cells were arrested in G2/M phases after PTXNR and PTXNR-TTZ treatments, while untreated and TTZ treated cells showed most cells in G0/G1.

## SI Table 5: Cell Cycle Analysis

### BT-474

| Treatment | vs. Treatment | <i>p</i> -value |        |         |         |        |         |         |         |         |
|-----------|---------------|-----------------|--------|---------|---------|--------|---------|---------|---------|---------|
|           |               | 24 h            |        |         | 48 h    |        |         | 72 h    |         |         |
|           |               | G0/G1           | S      | G2/M    | G0/G1   | S      | G2/M    | G0/G1   | S       | G2/M    |
| PTXNR-TTZ | Untreated     | 0.0551          | 0.5392 | 0.0382* | 0.0029* | 0.2282 | 0.0017* | 0.0005* | 0.0021* | 0.0007* |
| PTXNR-TTZ | PTXNR         | 0.8429          | 0.8978 | 0.9780  | 0.8852  | 0.6973 | 0.7662  | 0.6049  | 0.1159  | 0.3776  |
| PTXNR-TTZ | TTZ           | 0.2262          | 0.6231 | 0.3015  | 0.0245* | 0.4362 | 0.0139* | 0.0014* | 0.0051* | 0.0018* |
| PTXNR     | Untreated     | 0.0689          | 0.6218 | 0.0393* | 0.0027* | 0.3725 | 0.0020* | 0.0006* | 0.0072* | 0.0010* |
| PTXNR     | TTZ           | 0.2902          | 0.7131 | 0.3121  | 0.0214* | 0.6787 | 0.0181* | 0.0018* | 0.0238* | 0.0032* |
| TTZ       | Untreated     | 0.2786          | 0.8962 | 0.1364  | 0.0408* | 0.6070 | 0.0286* | 0.0646  | 0.2088  | 0.0858  |

## SI Table 6: Western Blot Analysis

### BT-474

| Treatment | vs. Treatment | <i>p</i> -value |         |                           |           |                    |         |
|-----------|---------------|-----------------|---------|---------------------------|-----------|--------------------|---------|
|           |               | XIAP            | Actin   | Cleaved Caspase - 9 (p10) | Caspase 3 | Cleaved Caspase -3 | Cyt- C  |
| PTXNR-TTZ | Untreated     | 0.0094*         | <.0001* | 0.0235*                   | 0.0150*   | 0.0494*            | 0.0391* |
| PTXNR-TTZ | PTXNR         | 0.3926          | 0.0721  | 0.3251                    | 0.4507    | 0.7168             | 0.7549  |
| PTXNR-TTZ | TTZ           | 0.0243*         | <.0001* | 0.0693                    | 0.0099*   | 0.4133             | 0.5425  |
| PTXNR     | Untreated     | 0.0375*         | <.0001* | 0.0094*                   | 0.0622    | 0.0301*            | 0.0548  |
| PTXNR     | TTZ           | 0.0989          | <.0001* | 0.0230*                   | 0.0417*   | 0.6332             | 0.7576  |
| TTZ       | Untreated     | 0.5503          | 0.6209  | 0.3330                    | 0.8262    | 0.0163*            | 0.0779  |

### MDA-MB-231

| Treatment | vs. Treatment | <i>p</i> -value |         |                           |           |                    |         |
|-----------|---------------|-----------------|---------|---------------------------|-----------|--------------------|---------|
|           |               | XIAP            | Actin   | Cleaved Caspase - 9 (p10) | Caspase 3 | Cleaved Caspase -3 | Cyt- C  |
| PTXNR-TTZ | Untreated     | 0.5631          | 0.0028* | 0.7904                    | 0.4751    | -                  | 0.0160* |
| PTXNR-TTZ | PTXNR         | 0.1208          | 0.0009* | 0.5113                    | 0.3466    | -                  | 0.3400  |
| PTXNR-TTZ | TTZ           | 0.2954          | 0.0046* | 0.3973                    | 0.4565    | -                  | 0.7792  |
| PTXNR     | Untreated     | 0.2525          | 0.0919  | 0.6854                    | 0.8126    | -                  | 0.0429* |
| PTXNR     | TTZ           | 0.4880          | 0.0393* | 0.8317                    | 0.1058    | -                  | 0.4777  |
| TTZ       | Untreated     | 0.5973          | 0.4643  | 0.5437                    | 0.1578    | -                  | 0.0207* |

## Full Western Blot Images of BT-474 as shown in Figure 7(a)

**SI Figure 10 (a):** A single full-length Western gel blot was used for probing multiple protein expressions in BT-474 cells. The blot was cut into multiple strips following the protein transfer as revealed in **Figure 7(a)**. Here, the strip containing approximately 40-80 kDa region was imaged.

### XIAP

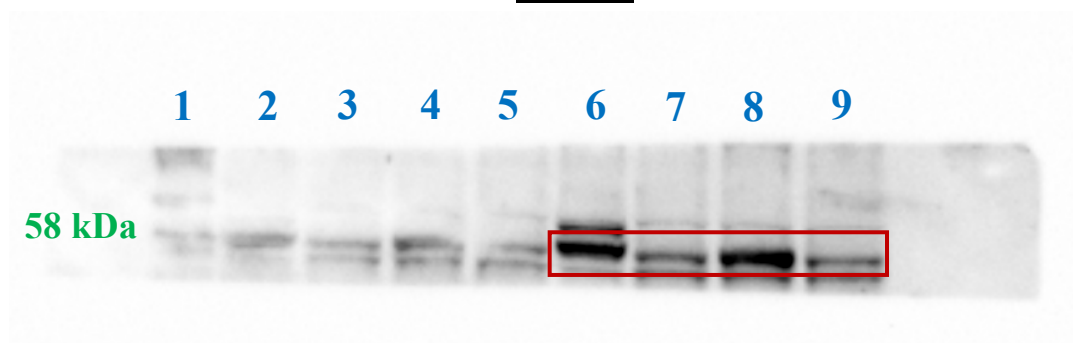

1, Protein ladder; 2, Untreated; 3, PTXNR; 4, TTZ; 5, PTXNR-TTZ; 6, Untreated; 7, PTXNR; 8, TTZ; 9, PTXNR-TTZ

### Actin

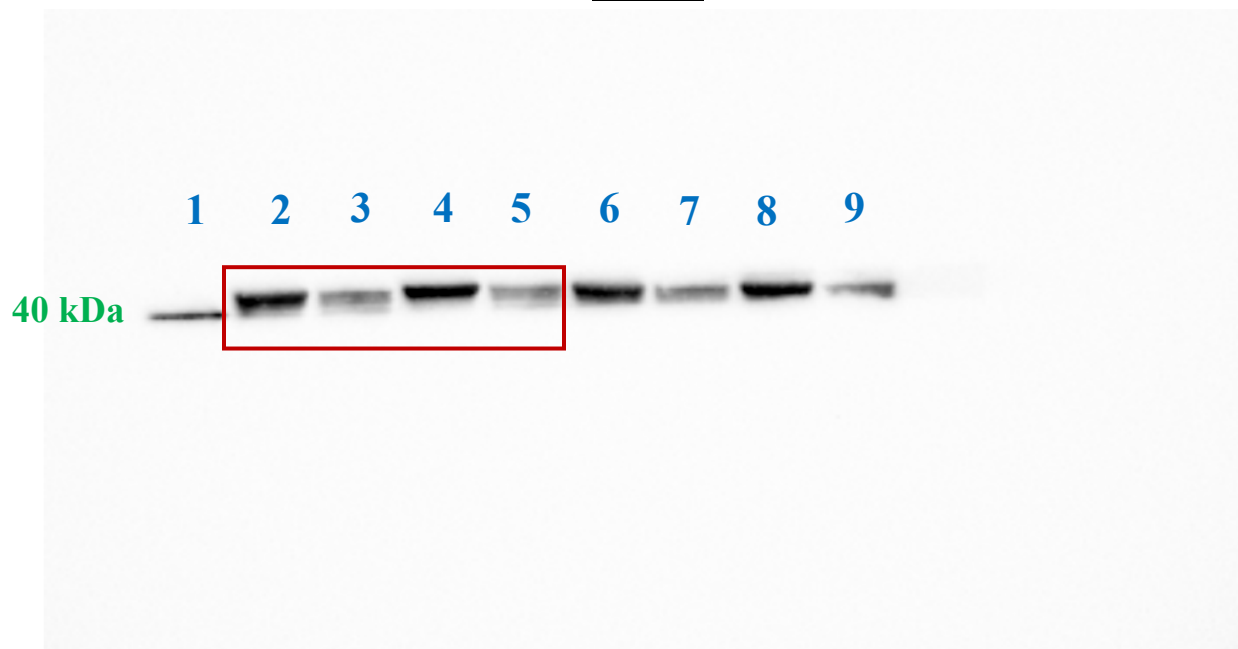

1, Protein ladder; 2, Untreated; 3, PTXNR; 4, TTZ; 5, PTXNR-TTZ; 6, Untreated; 7, PTXNR; 8, TTZ; 9, PTXNR-TTZ

## Fully Cleaved Caspase-9

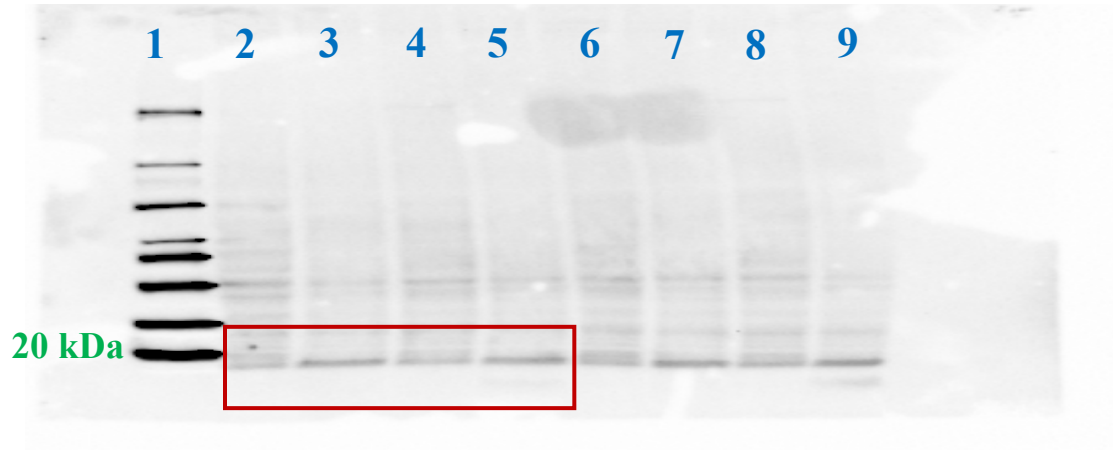

1, Protein ladder; 2, Untreated; 3, PTXNR; 4, TTX; 5, PTXNR-TTX; 6, Untreated; 7, PTXNR; 8, TTX; 9, PTXNR-TTX

## Caspase-3

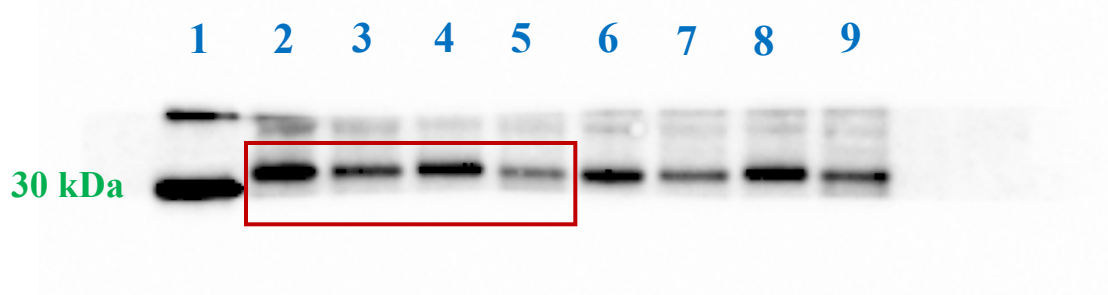

1, Protein ladder; 2, Untreated; 3, PTXNR; 4, TTX; 5, PTXNR-TTX; 6, Untreated; 7, PTXNR; 8, TTX; 9, PTXNR-TTX. Note: The blot was cut into multiple strips following the protein transfer.

A single full-length blot was used for probing multiple protein expression. Here, the strip containing 30-40 kDa region was imaged

## Cleaved Caspase-3

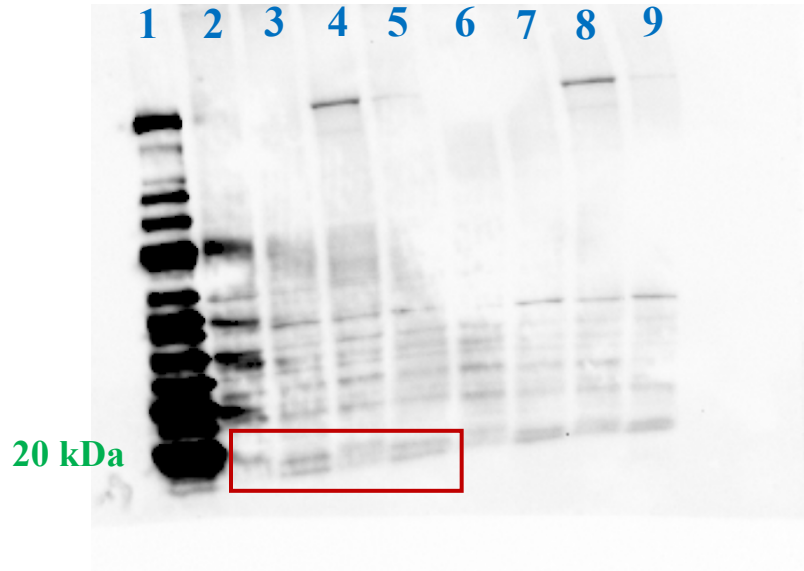

1, Protein ladder; 2, Untreated; 3, PTXNR; 4, TTZ; 5, PTXNR-TTZ; 6, Untreated; 7, PTXNR; 8, TTZ; 9, PTXNR-TTZ

## Cytochrome-C

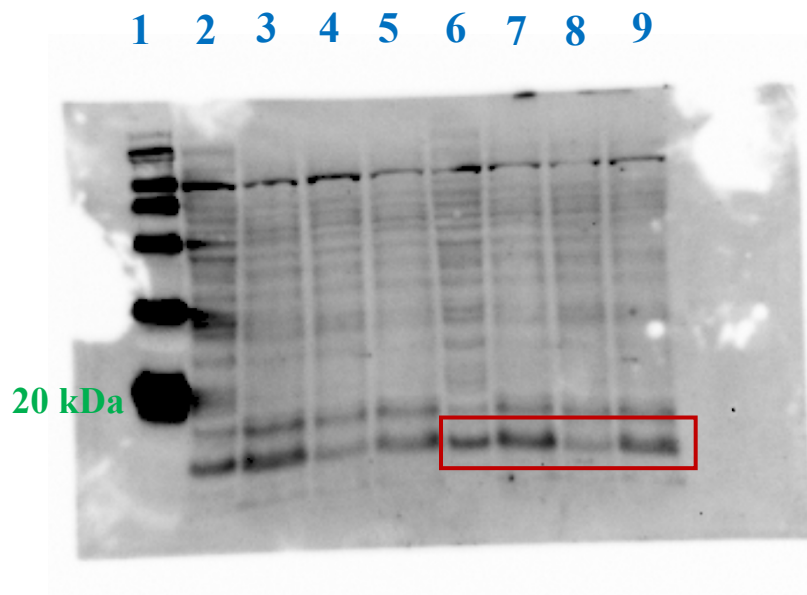



1, Protein ladder; 2, Untreated; 3, PTXNR; 4, TTZ; 5, PTXNR-TTZ; 6, Untreated; 7, PTXNR; 8, TTZ; 9, PTXNR-TTZ

## GAPDH

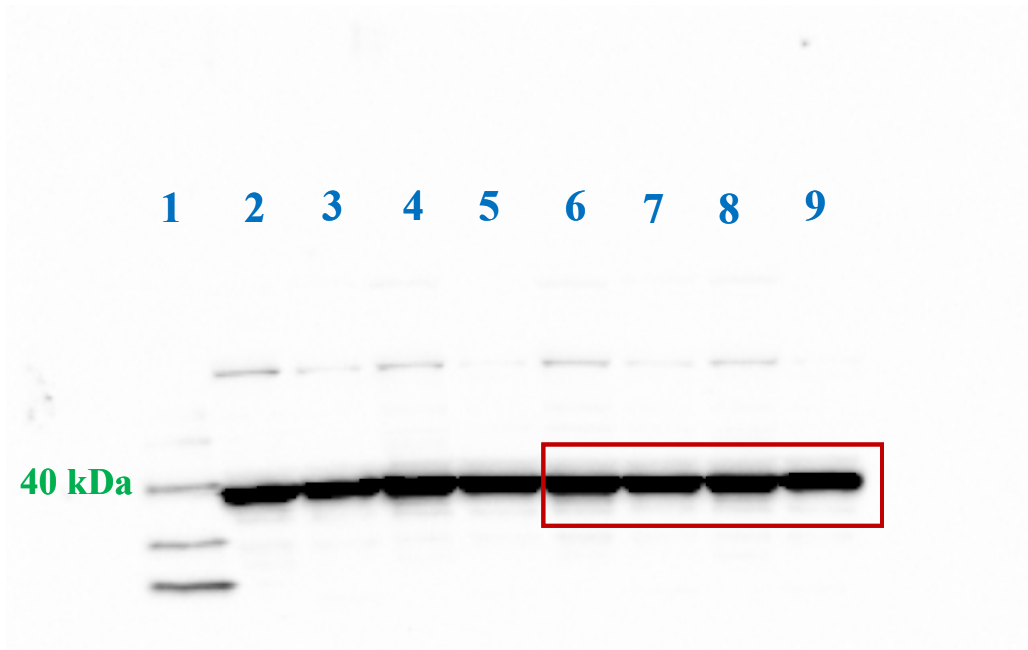

1, Protein ladder; 2, Untreated; 3, PTXNR; 4, TTZ; 5, PTXNR-TTZ; 6, Untreated; 7, PTXNR; 8, TTZ; 9, PTXNR-TTZ

## Full Western Blot Images of MDA-MB-231 as shown in Figure 7(b)

**SI Figure 10 (b):** A single full-length blot was used for probing multiple protein expressions in MDA-MB-231 cells. The blot was cut into multiple strips following the protein transfer. Here, the strip containing 40-80 kDa region was imaged as revealed in **Figure 7(b)**.

### XIAP

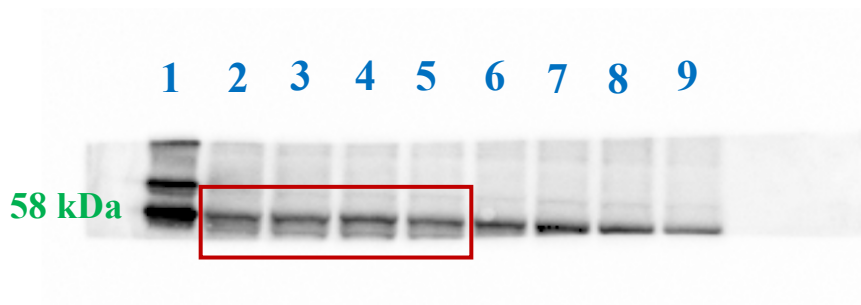

1, Protein ladder; 2, Untreated; 3, PTXNR; 4, TTZ; 5, PTXNR-TTZ; 6, Untreated; 7, PTXNR; 8, TTZ; 9, PTXNR-TTZ

### Actin

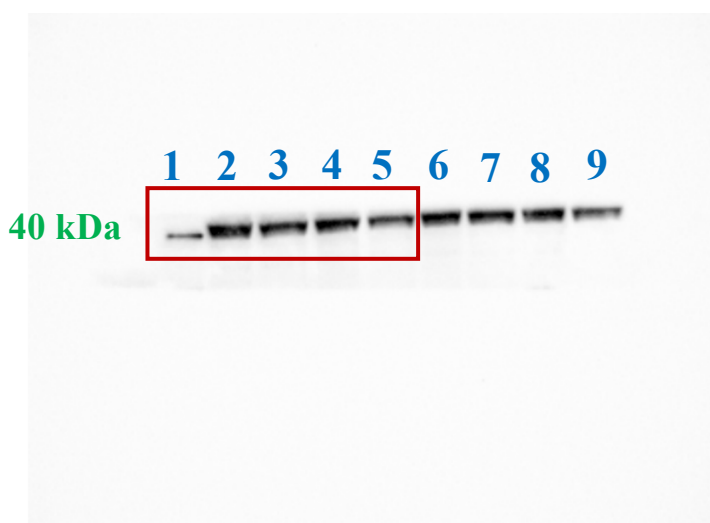

1, Protein ladder; 2, Untreated; 3, PTXNR; 4, TTZ; 5, PTXNR-TTZ; 6, Untreated; 7, PTXNR; 8, TTZ; 9, PTXNR-TTZ

## Fully Cleaved Caspase-9

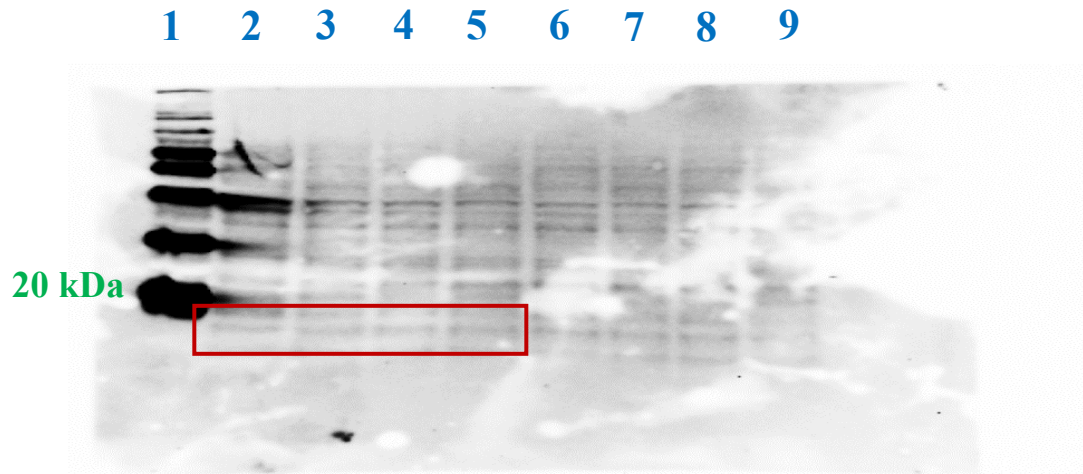

1, Protein ladder; 2, Untreated; 3, PTXNR; 4, TTZ; 5, PTXNR-TTZ; 6, Untreated; 7, PTXNR; 8, TTZ; 9, PTXNR-TTZ

## Caspase-3

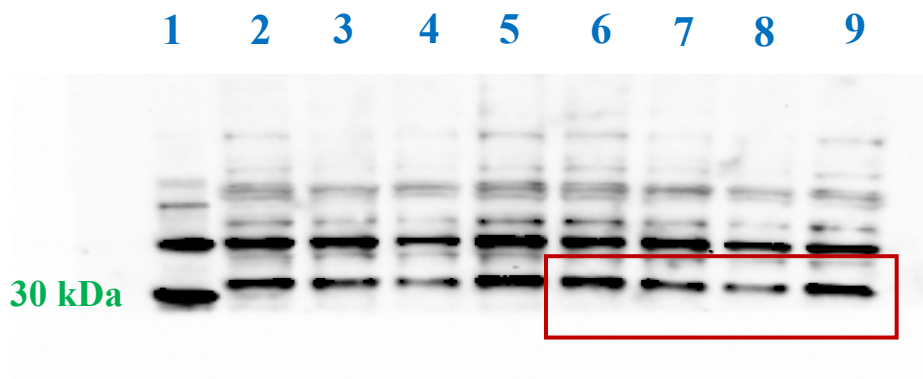

1, Protein ladder; 2, Untreated; 3, PTXNR; 4, TTZ; 5, PTXNR-TTZ; 6, Untreated; 7, PTXNR; 8, TTZ; 9, PTXNR-TTZ

## Cleaved Caspase-3

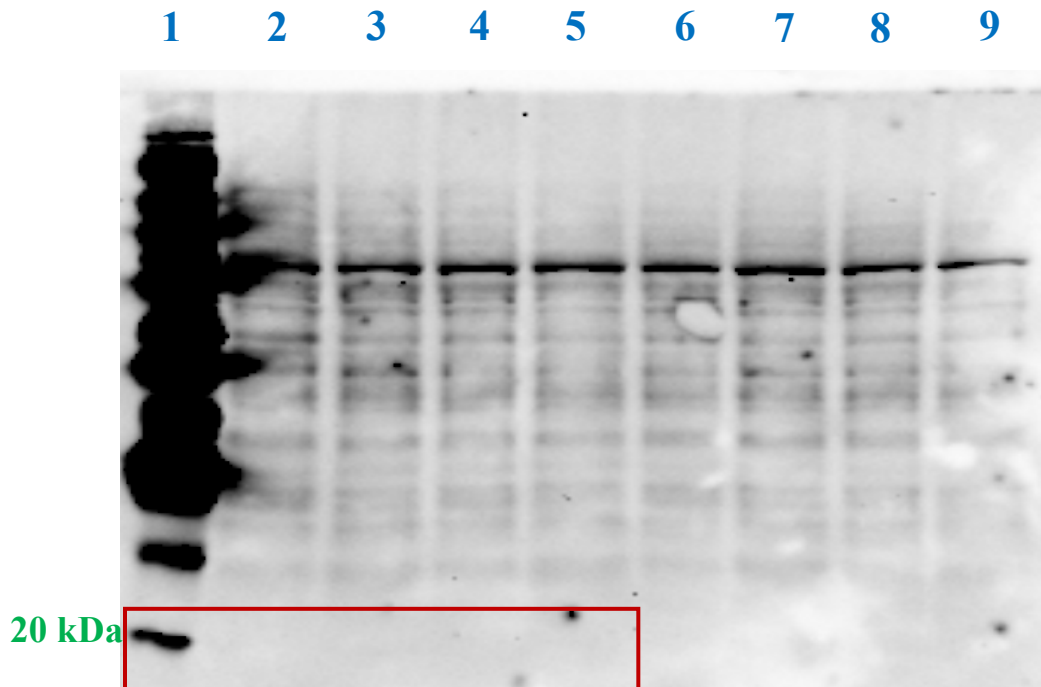

1, Protein ladder; 2, Untreated; 3, PTXNR; 4, TTZ; 5, PTXNR-TTZ; 6, Untreated; 7, PTXNR; 8, TTZ; 9, PTXNR-TTZ

## Cytochrome-C

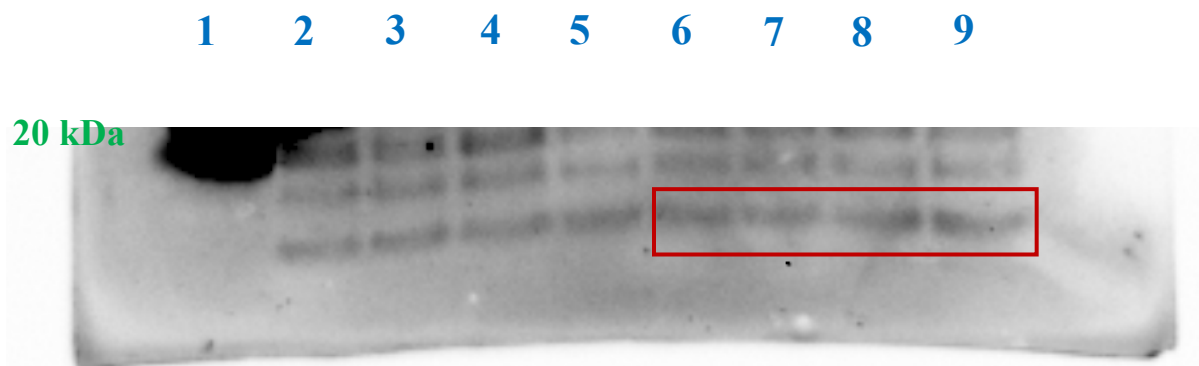

1, Protein ladder; 2, Untreated; 3, PTXNR; 4, TTZ; 5, PTXNR-TTZ; 6, Untreated; 7, PTXNR; 8, TTZ; 9, PTXNR-TTZ. Note: The blot was cut into multiple strips following the protein transfer.

A single full-length blot was used for probing multiple protein expression. Here, a narrow strip around >20 kDa region was imaged

## GAPDH

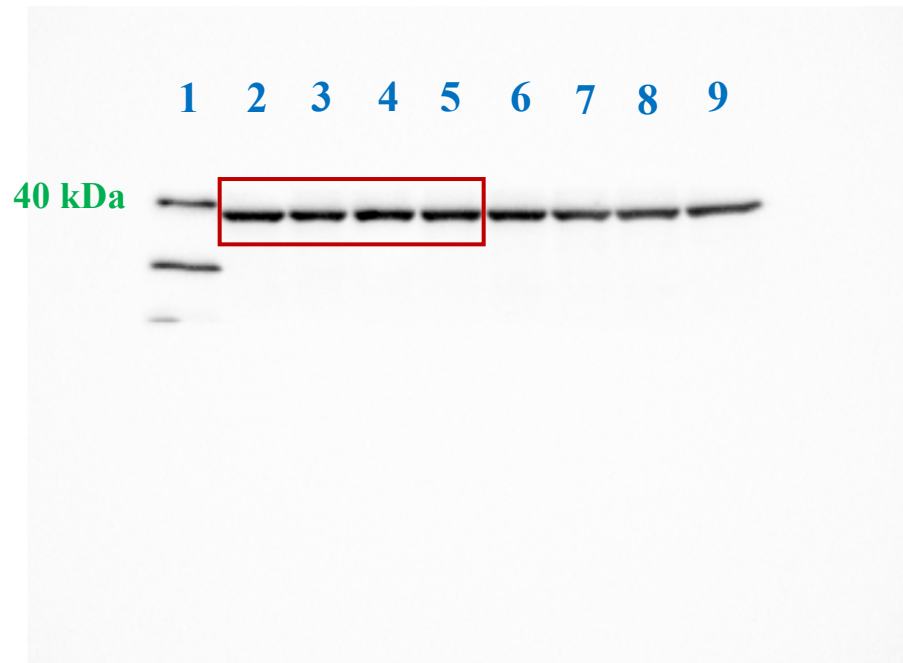

1, Protein ladder; 2, Untreated; 3, PTXNR; 4, TTZ; 5, PTXNR-TTZ; 6, Untreated; 7, PTXNR; 8, TTZ; 9, PTXNR-TTZ
